# Supplementary material
Source: Springer Nature journal article supplement (https://www.springermedizin.de/resource/supplementary/13058_2009_2430_MOESM4_ESM.pdf/9701392)

A

## Promoter hypermethylation frequencies

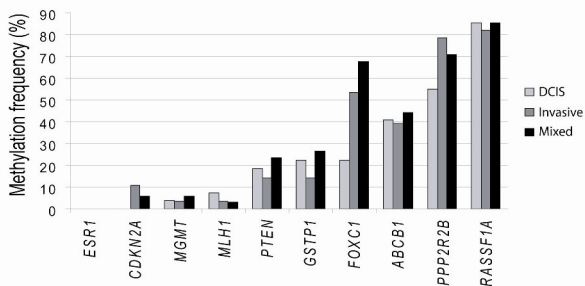

B

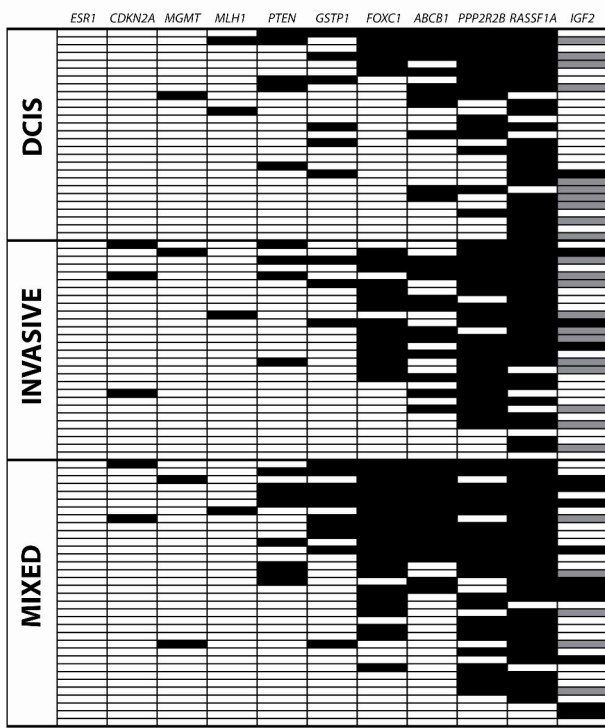

Supplement: MOESM4 [file 9701392]
